# Supplementary material for: Synthesis and electrical characterization of rhenium-doped WS2 nanotubes
Source: Royal Society of Chemistry journal article supplement (doi:10.1039/d6na00219f), 2026-05-29
Supplement: d6na00219f1.pdf [file d6na00219f1.pdf]

Supporting information

**Synthesis and Electrical Characterization of Rhenium-Doped WS<sub>2</sub> Nanotubes**

Abdul Ahad,<sup>a,b</sup> Saitou Shigeki,<sup>a</sup> Ryuji Higashinaka,<sup>a</sup> Masaharu Kikuchi,<sup>a</sup> Satoshi Kusaba,<sup>a</sup>

Zheng Liu,<sup>d</sup> Yasushi Hirose,<sup>c</sup> and Kazuhiro Yanagi,<sup>a</sup>

<sup>a</sup>Department of Physics, Tokyo Metropolitan University, Hachioji, Tokyo 192-0397, Japan

<sup>b</sup>Department of Physics, Comilla University, Cumilla-3506, Bangladesh

<sup>c</sup>Department of Chemistry, Tokyo Metropolitan University, Hachioji, Tokyo 192-0397, Japan

<sup>d</sup>Muti-Material Research Institute, National Institute of Advanced Industrial Science and Technology (AIST), Nagoya 463-8560, Japan

E-mail: [yanagi-kazuhiro@tmu.ac.jp](mailto:yanagi-kazuhiro@tmu.ac.jp)

## 1. Synthesis of $W_{18}O_{49}$ -NWs and pristine $WS_2$ -NTs

The CVD-grown  $W_{18}O_{49}$ -NWs were synthesized on the c-plane sapphire substrate within a three-zone electric furnace following our previous study,<sup>1</sup> the only difference was the temperature. Here, we used upstream temperature 880 °C and downstream temperature 680 °C. In the case of pristine  $WS_2$ -NTs synthesis, we also used our previous system and conditions<sup>1</sup> excepting conversion temperature. For proper sulfurization, we used NWs' temperature 760 °C and sublimation temperature of sulfur lump 250 °C.

### 1.1 Preparation of ampoule for synthesizing Re-doped $WS_2$ -NTs

To prepare a 25 cm long ampoule, we started with a 100 cm long quartz tube. The tube was divided in half using an  $N_2/O_2$  gas burner, resulting in two 50 cm long sections, each with one end sealed. We placed 12 mg of  $ReO_3$  as the precursor of Re atoms and 15 mg of  $I_2$  as the carrier into one end of the tube (designated as point A). To prevent the substrate from dropping into point A, we created a neck approximately 15-16 cm away from the  $ReO_3$  and  $I_2$ .

Next, we inserted the substrate containing pristine  $WS_2$ -NTs into the tube at point B. After inserting the substrate, we formed another neck at point C, approximately 9–10 cm from point B. This neck was made particularly deep because it would later be sealed. The tube was then connected to a rotary pump and a diffusion pump, achieving a vacuum of approximately  $5 \times 10^{-5}$ – $10^{-4}$  Pa. Once the vacuum was established, the tube was sealed, completing the preparation of the 25 cm long ampoule. The same procedure was followed to prepare another ampoule using the remaining 50 cm section.

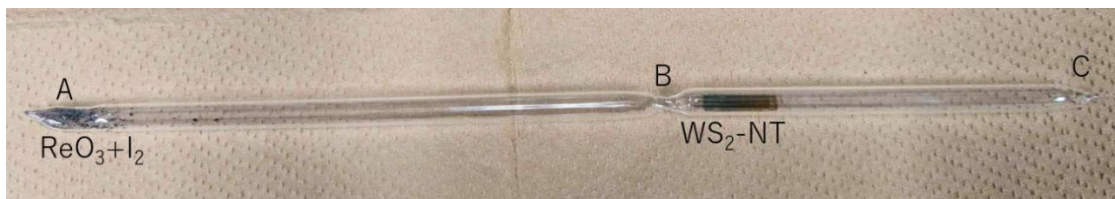

**Fig. S1:** A photo of the ampoule contains  $ReO_3$ ,  $I_2$  reagent, and a sapphire substrate on which pristine  $WS_2$ -NTs were synthesized.

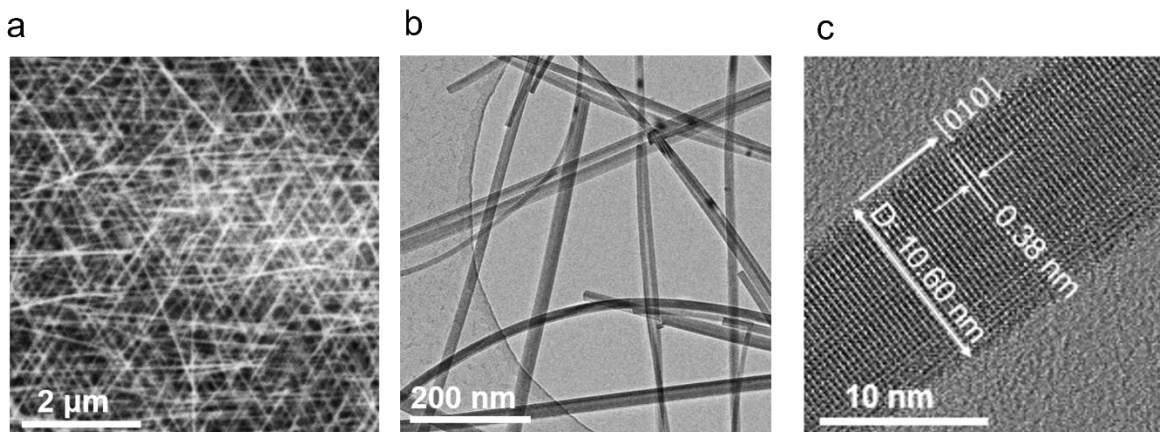

**Fig. S2** CVD-grown  $W_{18}O_{49}$ -NWs on the sapphire substrate. (a) SEM, and (b) low magnified TEM image shows the flake free morphology of the samples. (c) HRTEM image expresses the crystal structure and growth direction of the individual NWs. Our studied NWs were confirmed as single crystalline, exhibiting a lattice spacing of 0.38 nm along the [010] growth direction, which corresponds to the monoclinic non-stoichiometric phase of  $W_{18}O_{49}$ .<sup>2,3</sup>

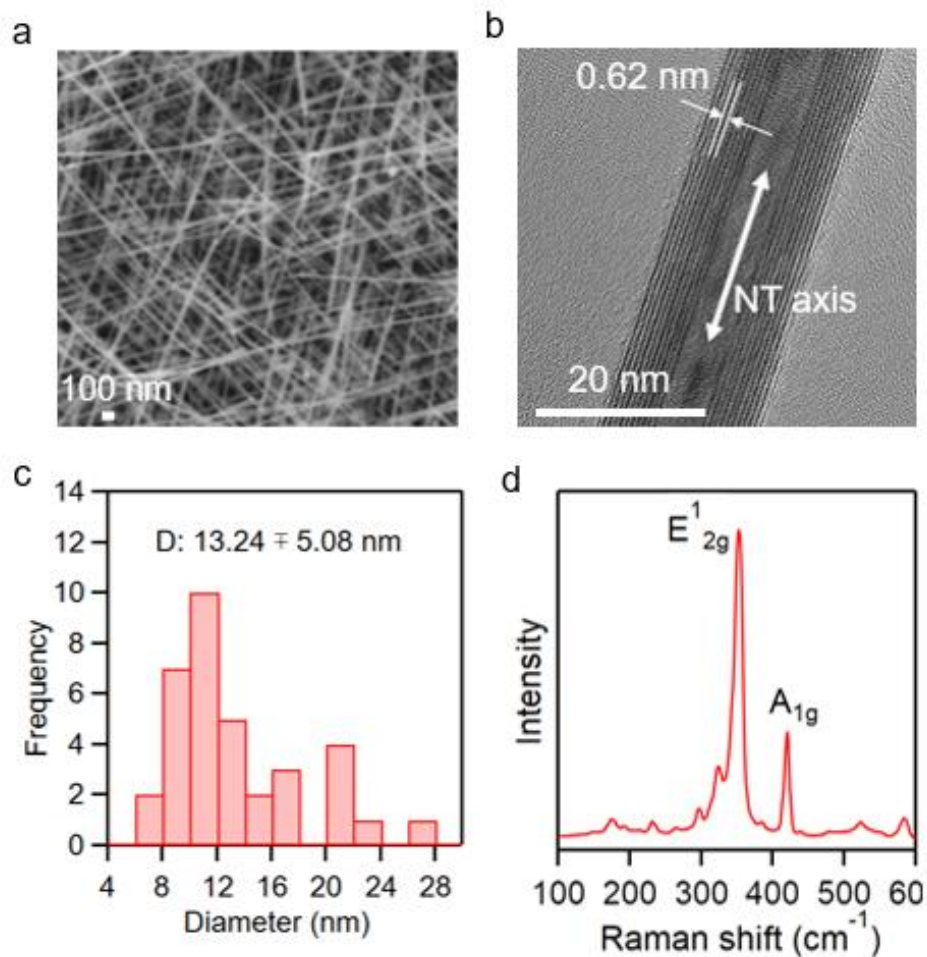

**Fig. S3** Structural evolution of pristine WS<sub>2</sub>-NTs. (a) SEM image, (b) HRTEM image indicating the NT axis direction with a white arrow, (c) Diameter distribution histogram of the NTs with standard deviation, where 35 NTs were used in this analysis, and (d) Raman shift of pristine WS<sub>2</sub>-NTs. In-plane and out-of-plane Raman mode at 354 and 419 cm<sup>-1</sup>.

### Temperature dependent Re:WS<sub>2</sub>-NTs

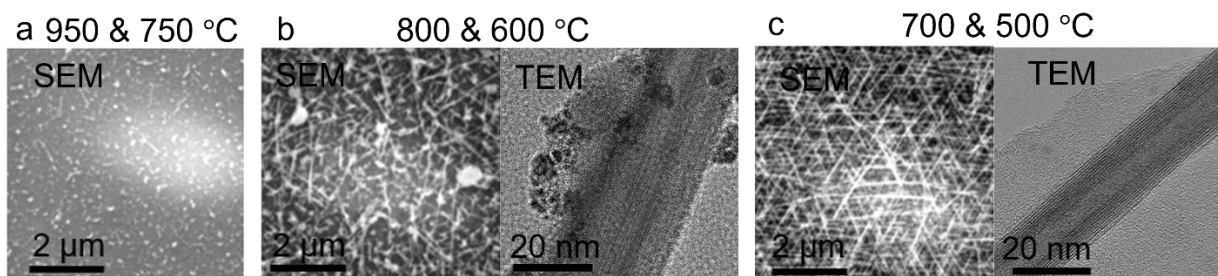

**Fig. S4** (a) Due to high synthesis temperature, the majority of the NTs decomposed, resulting in the formation of particle-like structures. Owing to the loss of tubular morphology, further structural characterizations were not carried out for these samples. Subsequently, the synthesis temperatures were reduced, and SEM imaging (b) revealed the presence of tubular structures. HRTEM image showed partially broken NTs with poor crystallinity. EDS analysis confirmed the presence of Re at approximately 22 at.%, which was significantly higher than anticipated. Additionally, the W:S atomic ratio 9:2 (W: 46 at.%, S: 10 at.%), indicating sulfur deficiency and suggesting that a further reduction in synthesis temperature is necessary to improve stoichiometry and structural integrity. (c) When a temperature gradient of 200 °C was applied, with the high-temperature zone at 700 °C and the low-temperature zone at 500 °C, the formation of well-defined nanotubular morphology and crystalline structure was observed, as expected.

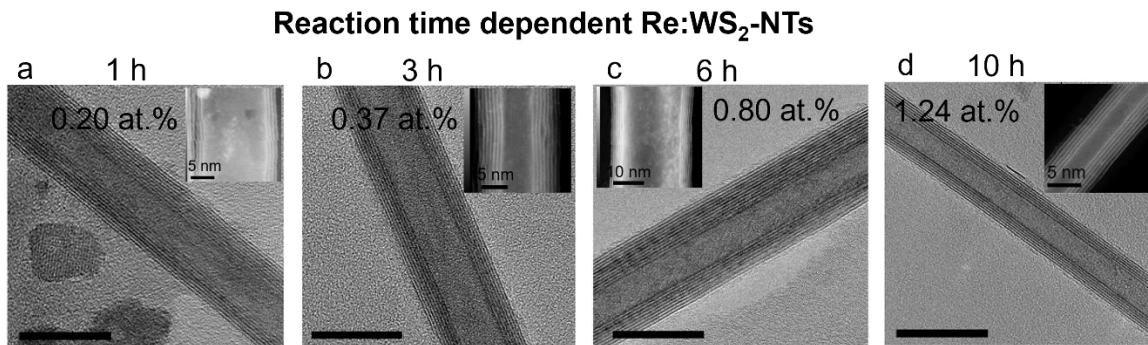

**Fig. S5** Re-doped WS<sub>2</sub>-NTs were synthesized under varying reaction times. The scale bar is 20 nm. At shorter durations (a), particle-like structures were observed alongside the NTs. In contrast, at longer reaction times (b-d), well-formed nanotubular structures were obtained. Considering improved morphological uniformity and higher Re incorporation, a reaction time of 10 hours was selected for further studies.

### ReO<sub>3</sub> dependent Re:WS<sub>2</sub>-NT

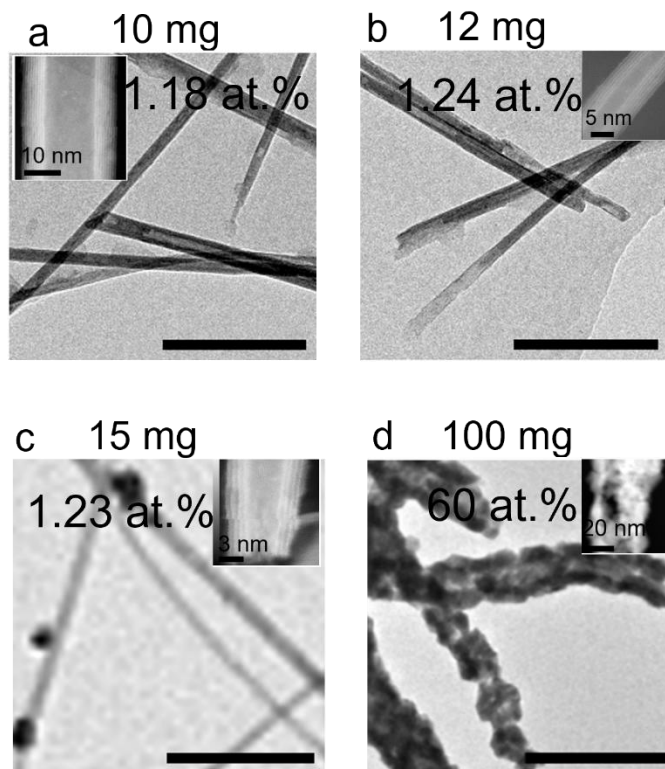

**Fig. S6** A series of experiments were conducted to investigate the effect of ReO<sub>3</sub> precursor concentration on the morphology and composition of Re-doped WS<sub>2</sub>-NTs. The scale bar in all images is 200 nm. Successful synthesis of Re-doped WS<sub>2</sub>-NTs was achieved using 10-12 mg of ReO<sub>3</sub> powder (a-b), with 12 mg yielding more uniform and well-formed NTs. However, when the ReO<sub>3</sub> amount was increased to 15 mg (c), a significant number of particle-like structures appeared on the sample surface, indicating morphological degradation. To further examine the effect of excessive Re, the ReO<sub>3</sub> quantity was drastically increased to 100 mg (d). Elemental analysis revealed an Re concentration of approximately 60 at.% and a W content of only 4 at.%, along with 33 at.% oxygen. These results suggest that under such conditions, the WS<sub>2</sub>-NTs were nearly converted into ReO<sub>3</sub>-based wire-like structures.

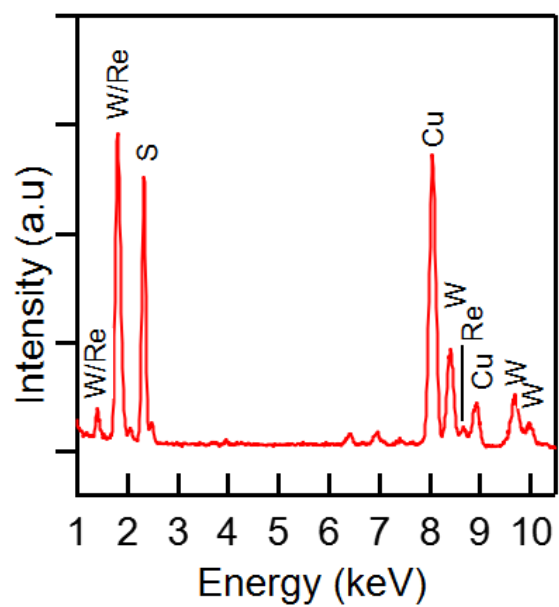

**Fig. S7** EDS spectra of Re-doped WS<sub>2</sub>-NTs. Due to small energy differences, the X-ray emission line of W and Re overlaps at M-line region.

## 2. Analysis procedure of I-V characteristics using Metal-Semiconductor-Metal (M-S-M) model.

We calculated Schottky barriers heights using metal-semiconductor-metal (M-S-M) model.<sup>4</sup> We assume the Schottky barrier 1, WS<sub>2</sub>-NT (NT), and Schottky barrier 2. When the channel voltage  $V$  is applied between the two metal electrodes, the total voltage is denoted as

$$V = V_1 + V_{NT} + V_2 \quad (1)$$

Here  $V_1$ , and  $V_{NT}$  and  $V_2$  are voltage drops at the barrier 1, NT and the barrier 2, respectively. In the two Schottky barriers, one is the forward biased and the other is the reverse biased. According to the thermionic emission theory, the current density is written as

$$J(V, \phi_b) = A^* T^2 \exp\left(-\frac{\phi_b}{kT}\right) \left(\exp\left(\frac{qV}{kT}\right) - 1\right) \quad (2)$$

Here  $A^* = 4\pi m^* q k^2 / h^3$  is the Richardson constant of the semiconductor,  $m^*$  is effective mass,  $\phi_b$  is the effective Schottky barrier height,  $k$  is the Boltzmann constant,  $q$  is the magnitude of the electronic charge,  $T$  is the absolute temperature. Here the forward biased current ( $V > 0$ ) is taken as positive, and the reverse biased ( $V < 0$ ) current is taken as negative. In the nano-M-S-M structure, tunneling through the reverse-biased Schottky barrier becomes significant.<sup>4</sup> Thus, the current density of the one reverse biased (for consistency, here  $V < 0$  and the sign of the current is taken as negative) is,

$$J(|V|, \phi_b) = -J_{ST}(|V|, \phi_b) \exp\left[|V| \left(\frac{q}{kT} - \frac{1}{E_0}\right)\right] \quad (3)$$

Here

$$J_{ST}(|V|, \phi_b) = \frac{A^* T (\pi q E_{00})^{1/2}}{k} \exp\left(-\frac{\phi_b}{kT}\right) \left\{ q(|V| - \zeta) + \frac{\phi_b}{\cosh^2(qE_{00}/kT)} \right\}^{1/2}$$

with  $\zeta$  is the distance between the Fermi energy to the bottom of the conduction band, and  $E_0 = E_{00} \coth\left(\frac{qE_{00}}{kT}\right)$ ,  $E_{00} = \frac{\hbar}{2} \left[ \frac{N_d}{m^* \varepsilon_s \varepsilon_0} \right]^{1/2}$ ,  $N_d$  is the doner density,  $\varepsilon_s$  is the relative permittivity of the nanotube, and  $\varepsilon_0$  is the permittivity of free speace.

The current  $I$  flowing through the three components is the same, and thus

$$I = S_1 J_1(V, \phi_b) = V_{NT}/R_{NT} = S_2 J_2(V, \phi_b) \quad (4)$$

Here  $S_1$  and  $S_2$  are the contact areas of the Schottky barrier 1 and 2, and  $R_{NT}$  is the resistance of NT. Here we ignored the shunt resistances of the barrier 1 and 2.

Here we used the effective Richardson constant of WS<sub>2</sub>-NT =  $5.7 \times 10^5 \text{ Am}^2\text{K}^{-2}$  with  $m^* = 0.4m_0$ ,<sup>5</sup> and  $\epsilon_s$  is 1.20.<sup>5</sup>

According to the suggested approach to determine the parameters,<sup>4</sup> we determined the parameters as follows. First, the  $R_{NT}$  is determined by differentiating the I-V curve at around 10 V (Fig. 4(c-d)), then the determined the  $R_{NT}$  is used for the simulation as the initial parameter, respectively. After determining the  $R_{NT}$ , the I-V curve is replotted in logarithmic scale (Fig. S8(a-b)), and from the  $\ln(I)$  versus  $V$  at intermediate bias, then the  $E_0$  is determined from the slope of the linear component since the slope is given by

$$\text{slope} = \frac{q}{kT} - \frac{1}{E_0}$$

and then  $N_d$  is determined. The  $E_0 = 0.0261 \text{ eV}$  for pristine and  $E_0 = 0.0263 \text{ eV}$  Re-doped WS<sub>2</sub>-NTs, respectively, and thus  $N_d = 3.0 \times 10^{17} \text{ cm}^{-3}$  for pristine and  $N_d = 4.9 \times 10^{17} \text{ cm}^{-3}$  for Re-doped WS<sub>2</sub>-NT. The  $\phi_b$  is determined numerically from Eqs (1), (2), (3) and (4) through the fitting on the I-V characteristics. The fitted results are shown in Figures 4 (c) and (d) in the main manuscript. Finally, the  $R_{NT}$  for pristine WS<sub>2</sub>-NT is determined to be  $4.4 \times 10^{11} \Omega$ , and that of Re-doped NT is  $2.6 \times 10^9 \Omega$ . According to the NT diameters (19.4 nm for pristine and 11.3 nm for Re-doped which are determined by the AFM measurements) and channel length (3.0  $\mu\text{m}$ ), the electrical conductivity is determined to be  $2.3 \times 10^{-2} \text{ Sm}^{-1}$  for pristine WS<sub>2</sub>-NT, and  $1.1 \times 10 \text{ Sm}^{-1}$  for Re-doped NT. In addition, the Schottky barrier  $\phi_b = 0.75 \text{ eV}$  is estimated for

pristine, and  $\phi_b = 0.67$  eV for Re-doped, and the  $\zeta = 0.72$  eV for pristine,  $\zeta = 0.65$  eV for Re-doped WS<sub>2</sub>-NT.

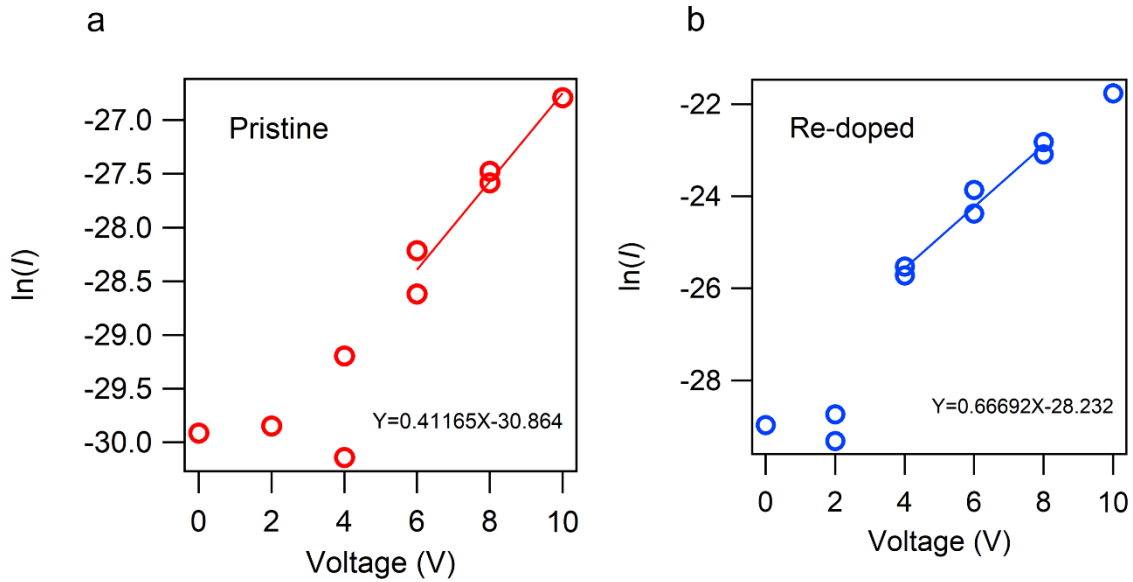

**Fig. S8** The  $\ln(I)$ - $V$  graphs of pristine (a) and Re-doped (b) WS<sub>2</sub>-NTs. From the slope, we determined the characteristic energy  $E_0$ , and subsequently the carrier density of the samples.

## References

1. A. Ahad, Y. Yomogida, M.A. Rahman, A. Ihara, Y. Miyata, Y. Hirose, K. Shinokita, K. Matsuda, K.; Z. Liu and K. Yanagi, K. *Nano Lett.*, 2024, **24**, 14286-14292.
2. K. Hong, M. Xie, R. Hu and H. Wu, *Appl. Phys. Lett.*, 2007, **90**, 173121.
3. H. Zhang, Y. Wang, S. Zuo, W. Zhou, J. Zhang and X. W.D. Lou, *J. Am. Chem. Soc.*, 2021, **143**, 2173-2177.
4. Z. Zhang, K. Yao, Y. Liu, C. Jin, X. Liang, Q. Chen and L. M. Peng, *Adv. Funct. Mater.*, 2007, **17**, 2478-2489.
5. A. Sengupta, and S. Mahapatra, *J. Appl. Phys.*, 2013, **113**, 194502.
